# Supplementary material for: Assessment of Hepatoprotective Effect of Chokeberry Juice in Rats Treated Chronically with Carbon Tetrachloride
Source: PubMed Central journal article supplement (PMC7144002; doi:10.3390/molecules25061268), 2020-03-11
Supplement: molecules-25-01268-s001.pdf [file molecules-25-01268-s001.pdf]

**Table S1. Oligonucleotide sequences and probe number used for RQ-PCR analysis**

| Transcript    | Sequence (5'-3' direction)    | Probe number | NCBI number | Product size (bp) |
|---------------|-------------------------------|--------------|-------------|-------------------|
| TNF $\alpha$  | 5'-CTCGAGTGACAAGCCCGTA-3'     | 119          | NM_012675.2 | 64 bp             |
|               | 5'-CCACTCCAGCTGCTCCTCT-3'     |              |             |                   |
| TGF $\beta$   | 5'-GAAGGACCTGGGTTGGAAGT-3'    | 117          | NM_021578.2 | 61 bp             |
|               | 5'-CAGACAGAAGTTGGCATGGTAG -3' |              |             |                   |
| MMP-2         | 5'-AGCGACCTCAGGGTGACA-3'      | 58           | NM_031054.2 | 67 bp             |
|               | 5'-CACTCCCCAGACCAATCGT-3'     |              |             |                   |
| TIMP-1        | 5'-TTTCCGGTTCGCCTACAC-3'      | 110          | NM_053819.1 | 66 bp             |
|               | 5'-CGGTTCTGGGACTTGTGG-3'      |              |             |                   |
| procollagen I | 5'-TGCTTGAAGACCTATGTGGGTA-3'  | 113          | NM_053304.1 | 71 bp             |
|               | 5'-AAAGGCAGCATTTGGGGTAT-3'    |              |             |                   |
| $\alpha$ -SMA | 5'-TGCCATGTATGTGGCTATTCA-3'   | 56           | NM_031004.2 | 61 bp             |
|               | 5'-ACCAGTTGTACGTCCAGAAGC-3'   |              |             |                   |
